# Supplementary material for: MicroRNA-125b promotes tumor metastasis through targeting tumor protein 53-induced nuclear protein 1 in patients with non-small-cell lung cancer
Source: PubMed Central journal article supplement (PMC4573481; doi:10.1186/s12935-015-0233-x), 2015-09-17
Supplement: 12935_2015_233_MOESM1_ESM.pdf [file 12935_2015_233_MOESM1_ESM.pdf]

Supplementary Figure 1

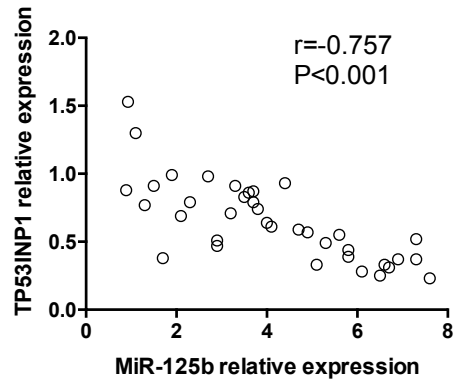

Expressions of miR-125b and TP53INP1 in isolated NSCLC cells were determined by qPCR and analyzed for their negative correlation.
